## GM1 mediates the formation and maintenance of cytotoxic A $\beta$ oligomers

Dong Yan Zhang<sup>1</sup>, Jian Wang<sup>1</sup>, Rebecca M. Fleeman<sup>1,2,3</sup>, Madison K. Kuhn<sup>1,2,3,4</sup>, Matthew T. Swilius<sup>6</sup>,  
Elizabeth A. Proctor<sup>1,2,3,4,5</sup>, and Nikolay V. Dokholyan<sup>1,4,6,7\*</sup>

<sup>1</sup>*Department of Pharmacology, Penn State College of Medicine, Hershey, PA, 17033-0850, USA.*

<sup>2</sup>*Department of Neurosurgery, Penn State College of Medicine, Hershey, PA, 17033-0850, USA*

<sup>3</sup>*Center for Neural Engineering, Pennsylvania State University, University Park, PA*

<sup>4</sup>*Department of Biomedical Engineering, Pennsylvania State University, University Park, PA*

<sup>5</sup>*Department of Engineering Science & Mechanics, Pennsylvania State University, University Park, PA*

<sup>6</sup>*Departments of Biochemistry & Molecular Biology, Penn State College of Medicine, Hershey, PA, 17033-0850, USA.*

<sup>7</sup>*Department of Chemistry, Pennsylvania State University, University Park, PA*

\*Corresponding author: Nikolay V. Dokholyan, E-mail: [dokh@psu.edu](mailto:dokh@psu.edu).

### ABSTRACT

The aggregation of amyloid beta (A $\beta$ ) peptide is associated with Alzheimer's disease (AD) pathogenesis. Cell membrane composition, especially monosialotetrahexosylganglioside (GM1), is known to promote the formation of A $\beta$  fibrils, yet little is known about the roles of GM1 in the early steps of A $\beta$  oligomer formation. Here, by using GM1-contained liposomes as a mimic of neuronal cell membrane, we demonstrate that GM1 is a critical trigger of A $\beta$  oligomerization and aggregation. We find that GM1 not only promotes the formation of A $\beta$  fibrils, but also facilitates the maintenance of A $\beta$  oligomers on liposome membranes. We structurally characterize the A $\beta$  oligomers formed on the membrane and find that GM1 captures A $\beta$  by binding to its arginine-5 residue. To interrogate the mechanism of A $\beta$  oligomer toxicity, we design a new liposome-based Ca<sup>2+</sup>-encapsulation assay and provide new evidence for the A $\beta$  ion channel hypothesis. Finally, we conduct cell viability assay to determine the toxicity of A $\beta$  oligomers formed on membranes. Overall, by uncovering the roles of GM1 in mediating early A $\beta$  oligomer formation and maintenance, our work provides a novel direction for pharmaceutical research for AD.

## INTRODUCTION

Alzheimer's disease is the most common neurodegenerative disorder, responsible for 60–70% of dementia cases (Burns and Iliffe, 2009). The economic burden associated with caring for nearly 50 million people worldwide with AD is estimated in the hundreds of billions of dollars annually (Vos et al., 2016). The pathophysiology of AD is characterized by the accumulation of extracellular plaques, predominantly composed of amyloid beta (A $\beta$ ), and cytoplasmic neurofibrillary tangles, mostly composed of tau protein. Despite multiple proposed hypotheses (Alves et al., 2015; Bartzokis, 2011; Cataldo et al., 2010; Deane and Zlokovic, 2007; Francis et al., 1999; Hardy and Allsop, 1991; Kandimalla et al., 2016; Miklossy, 2011; Mudher and Lovestone, 2002; Pisa et al., 2015; Su et al., 2008), the molecular etiology of the disease remains a mystery. One of the oldest and most central hypotheses, the *amyloid cascade hypothesis*, posits that the accumulation of A $\beta$  proteins in the brain is the primary cause of AD pathogenesis, leading to tau pathology, neuroinflammation, synapse loss, and ultimately neuron death (Hardy, 2006; Hardy and Higgins, 1992; Iversen et al., 1995; Jakob-Roetne et al., 2009; Tanzi and Bertram, 2005).

The *amyloid cascade hypothesis* was subsequently revised to *A $\beta$  oligomers cascade hypothesis* (Bernstein et al., 2009; Butterfield and Lashuel, 2010; Glabe, 2008; Matsumura et al., 2011; Quist et al., 2005), stating that small A $\beta$  oligomers (DeToma et al., 2012; Haass and Selkoe, 2007) rather than fibrils (Klein et al., 2001; Lambert et al., 2001) are the main toxic species, is an alternative to the original amyloid cascade hypothesis. The oligomer hypothesis has been gaining significant momentum, since numerous studies have shown that A $\beta$  oligomers are toxic to primary neurons, inhibit hippocampal long-term potentiation, and cause memory impairment in rat or mouse models (Karran et al., 2011; Martinez Hernandez et al., 2018). Mounting evidence, stemming from other neurodegenerative diseases, also support the oligomer hypothesis. For example, in amyotrophic lateral sclerosis, soluble superoxide dismutase (SOD1) oligomers (Choi and Dokholyan, 2021; Proctor et al., 2015; Redler et al., 2014) of disease-associated proteins, rather than insoluble aggregates (Zhu et al., 2018), are shown to be responsible for cytotoxicity. Insoluble SOD1 aggregates have been found to be protective against neuronal toxicity, potentially due to competition with soluble oligomers (Bieschke et al., 2011; Zhu et al., 2018).

The mechanism of A $\beta$  oligomer toxicity is unknown, but several studies (Anekonda et al., 2011; Bhowmik et al., 2015; Jang et al., 2007, 2010; Quist et al., 2005) show that A $\beta$  oligomers may disrupt the plasma membrane to upset ionic (especially calcium) homeostasis. A number of mechanisms by which A $\beta$  oligomers induce cell membrane disruption have been proposed, including membrane thinning (Dante et al., 2008), excessive membrane tabulation (Pandey et al., 2011; Varkey et al., 2010), membrane extraction through amyloid–lipid co-aggregation (Hellstrand et al., 2013; Reynolds et al., 2011), and formation of ion channels to disrupt Ca<sup>2+</sup> homeostasis

(Arispe et al., 1993a; Shirwany et al., 2007). Membrane components can also promote the conformational change of A $\beta$  from  $\alpha$ -helix-rich structures to  $\beta$ -sheet-rich structures (Ikeda et al., 2011) and play a determining role in the uptake of A $\beta$  oligomers (Di Scala et al., 2016). Since cellular membranes are highly heterogeneous, containing many constituents, deciphering which cellular membrane components are catalyzing A $\beta$  cytotoxic action is challenging to untangle. Specifically, AD patients have much higher amounts of monosialotetrahexosylganglioside (GM1), a glycosphingolipid found in neuronal cell membranes (Yagi-Utsumi et al., 2010), than cognitively normal patients in the cerebrospinal fluid (Okada et al., 2007). GM1 clusters (Fernández-Pérez et al., 2017; Ikeda et al., 2011; Tachi et al., 2019; Yagi-Utsumi et al., 2010) are found to facilitate the  $\alpha$ -to- $\beta$  conformational transition of A $\beta$ 40. GM1-bound A $\beta$  has been found in early pathological changes of the AD brain (Kakio et al., 2002). While there is strong evidence that A $\beta$  binds to GM1 and acts as a seed to further promote the formation of A $\beta$  fibrils (Yanagisawa et al., 1995), the influence of GM1 on the formation of soluble A $\beta$  oligomers, the most toxic form, and whether GM1 is involved in the pathways responsible for A $\beta$  oligomer toxicity, remains a mystery.

Here, we employ *in vitro*, *in silico*, and cellular studies to interrogate the interaction between GM1 and A $\beta$  oligomers, and to uncover the mechanisms driving the assembly and toxicity of A $\beta$  oligomers (Figure 1). We utilize liposomes, artificial vesicles (0.05  $\mu$ m to 5  $\mu$ m in diameter (Mufamadi et al., 2011)) formed from phospholipid bilamellar membranes, to determine the interactions between A $\beta$  and lipid membranes in the presence of GM1. We find that GM1 promotes the maintenance of A $\beta$  oligomers. Using molecular dynamics simulations, we observe the interaction between A $\beta$  and GM1 and identify the most critical residue, R5, involved in the binding between A $\beta$  and GM1. We develop a fluorescence assay to interrogate the mechanism of A $\beta$  disrupting the membrane and also uncover the role of various membrane constituents on A $\beta$  aggregation. This fluorescence assay provides new evidences supporting the formation of A $\beta$  ion channels. We use mass spectrometry to characterize purified A $\beta$  oligomers formed on liposomes, and find that these membrane-associated A $\beta$  oligomers are composed of 16-21 monomers, rich in  $\beta$ -sheet. Finally, we perform cellular studies to demonstrate the neuronal toxicity of membrane-associated A $\beta$  oligomers. Overall, our results provide new insights into the mechanisms of A $\beta$  aggregation by revealing the role of GM1 in mediating early A $\beta$  oligomer formation and maintenance. Uncovering the mechanisms of A $\beta$  aggregation and determining critical cellular players responsible for downstream neurotoxicity is essential for the development of novel pharmaceutical strategies to treat AD.

## RESULTS

### GM1 liposomes promote A $\beta$ fibril formation and facilitate A $\beta$ oligomer maintenance

GM1 clusters on liposome membrane promote the formation of A $\beta$  fibrils (Kakio et al., 2001). Do GM1 clusters promote the formation of A $\beta$  oligomers? To answer this question, we incubate A $\beta$  peptides in the presence and absence of liposomes consisting of GM1, sphingomyelin, and cholesterol (GM1 liposomes) for 0.5 h, 4 h, 24 h, and 72 h, respectively and then perform 10% SDS-PAGE and silver staining (Figure 2A-2D). We use cholesterol and sphingomyelin in liposomes because they are the indispensable components of GM1 clusters. We find that in the absence of GM1 liposomes, A $\beta$  oligomers of different molecular weights are formed within 0.5 h, and the amount of A $\beta$  oligomers species then reduces with the increase of time. After 72 h, there are nearly no A $\beta$  oligomers. We speculate that the disappeared oligomers have formed larger assemblies, such as amyloid fibrils (Figure 2E). In the presence of GM1 liposomes, we still observe abundant A $\beta$  oligomers species formed within 0.5 h, and the amount of oligomer species reduces even more rapidly than when the A $\beta$  peptides are incubated without GM1 liposomes. However, after 72 h, we still observe a few clear A $\beta$  oligomer bands (30, 35, 40, 45, 60 kDa), indicating that some oligomers are arrested in their state, thus suggesting some distinct oligomer species from those formed without GM1. Thus, GM1 can promote the formation of fibrils by catalyzing oligomers to form fibrils, but GM1 can also facilitate the maintenance of certain oligomer species.

To interrogate if the disappeared oligomers form fibrils, we determine the formation of fibrils (Figure 2E) through thioflavin T (ThT)-binding assay; ThT is a benzthiazole dye to detect A $\beta$  fibrils (Gade Malmos et al., 2017). We incubate 80  $\mu$ M A $\beta$  with ThT in the presence and absence of GM1 liposomes and find that ThT fluorescence intensities increase with time (Figure 2E), indicating that 80  $\mu$ M A $\beta$  monomers incubated in the presence and absence of GM1 liposomes both aggregate into fibrils. Consistent with previous reports (Yanagisawa, 2005), we find that A $\beta$  aggregates faster and forms a greater number of aggregates in the presence of GM1 liposomes, suggesting that GM1 liposomes promote the formation of A $\beta$  fibrils. Overall, previous studies have reported that A $\beta$  binding to GM1 is a seeding step to form larger aggregates (Yanagisawa et al., 1995), and our work further shows that (1) A $\beta$  oligomers form rapidly in 0.5 h but then partially disappear because they begin to assemble into higher molecular weight aggregates, (2) A $\beta$  fibrils form more rapidly in the presence of GM1, and (3) GM1 maintain some A $\beta$  oligomer species, probably because these species may have direct interaction with GM1. These oligomers are likely to be structurally distinct from oligomers formed on-pathway to fibrils.

To confirm the direct interaction between A $\beta$  and GM1, we utilize Förster resonance energy transfer (FRET) to detect the interaction between Alexa Fluor™ 555 CTSB labeled GM1 and Alexa Fluor® 488 6E10 labeled A $\beta$  (Figure 2F). We add Alexa Fluor® 488 6E10, Alexa Fluor™ 555 CTSB, and a mixture of Alexa Fluor® 488 6E10 and Alexa Fluor™ 555 CTSB to the samples of A $\beta$  incubated with GM1 liposome, respectively, to compare the fluorescence emission spectra. The fluorescence intensity peak of the donor at 518 nm reduces to approximately 51% of that of

the mixture of Alexa Fluor® 488 6E10 and Alexa Fluor™ 555 CTSB, and combines with an increasing approximately 15% fluorescence intensity peak of the receptor at 566 nm. The changes of the fluorescence intensity peaks are due to the non-radiative energy transfer from Alexa Fluor® 488 to Alexa Fluor™ 555, suggesting an efficient FRET from A $\beta$  to GM1 liposomes membrane. Thus, we speculate that the maintenance of certain A $\beta$  oligomers species may be the result of the direct physical interaction to GM1 clusters.

In turn, A $\beta$  oligomers also impact the morphology of GM1 membranes. We use cryo-electron tomography (cryo-TEM) to analyze the morphology of liposomes incubated with or without A $\beta$ . In the absence of A $\beta$ , GM1 liposomes form bilamellar vesicles with smooth surfaces (Figure 2G&H), while in the presence of A $\beta$ , GM1 liposomes become unilamellar vesicles and the membranes of these liposomes are disordered and deformed. Thus, the presence of A $\beta$  oligomers significantly affects the surface morphology of GM1 liposome membranes by deforming the membranes. We posit that for neurons, A $\beta$  may interact with GM1 clusters in cell membranes (Bhowmik et al., 2015; Jang et al., 2007, 2010; Quist et al., 2005) in a similar fashion in the brain, thereby resulting in deformed membrane and, ultimately, in neurotoxicity and synaptic loss (Du et al., 2019).

### **R5 of A $\beta$ 42 plays an important role in the interaction of A $\beta$ and GM1 membranes**

We perform 100 ns molecular dynamics (MD) simulations of GM1 membrane and 5 A $\beta$ 42 monomers (Figure 3A). We calculate the minimum distance between atoms of each residue of A $\beta$  and all atoms of GM1 on the membrane. We find that the fifth residue (arginine, R5) of A $\beta$  maintains a distance of 1-2 Å from GM1 (Figure 3C&D), suggesting that R5 stably binds GM1. Thus, we posit that R5 plays a critical role in the interaction between A $\beta$  and GM1, specifically, the guanidine group in R5 interacting with the O11 and O12 atoms in GM1 (Figure 3B). We further computationally substitute R5 to glycine, and upon performing MD simulations we find that the average distance between G5 and GM1 increases to >10 Å (Figure 3E) and is within binding distance (<2 Å) for as little as 2% of the time (Figure 3F), indicating that the mutation of R5G disrupts the tight binding interaction between the fifth residue and GM1. This result strongly suggests the critical role of R5 in GM1-A $\beta$  interaction.

To confirm the role of R5 experimentally, we substitute arginine with glycine and then utilize FRET to detect the interaction between the mutant A $\beta$  and GM1 membrane (Figure 3G). The fluorescence intensity peak of the acceptor at 566 nm of the mixture of Alexa Fluor® 488 6E10 and Alexa Fluor™ 555 CTSB is similar to that of the sample containing only the acceptor. In contrast to wild type A $\beta$  (Figure 2F), there is no energy transfer from donor to acceptor for the mutant A $\beta$ , indicating that the mutant A $\beta$  does not bind to the GM1 liposome membrane. To determine the effect of the mutation on the formation of fibrils, we perform the ThT-based fibril detection assay for the mutants. We find that R5G aggregates into fibrils in 100 min, then the fibrils slowly dissociate (Figure 3H&I). In comparison, the wild type A $\beta$  fibrils do not dissociate

(Figure 2E). This observation suggests that R5 also plays an important role in A $\beta$  fibril stability. Finally, we find that compared to HEPES buffer, the presence of GM1 liposomes inhibits aggregation of the mutant A $\beta$  into fibrils, as the sample with GM1 liposomes always feature a lower ThT fluorescence intensity.

### **GM1-catalyzed channel formation by A $\beta$ oligomers**

Various mechanisms (Dante et al., 2008; Hellstrand et al., 2013; Pandey et al., 2011; Reynolds et al., 2011; Varkey et al., 2010) by which A $\beta$  oligomers disrupt cell membranes have been proposed. Our work strongly supports the ion channel hypothesis (Kagan et al., 2002) that posits that A $\beta$  oligomers damage neuron by forming ion channels channels (Arispe et al., 1993a; Shirwany et al., 2007). Although the hypothesis provides a biophysical mechanism for explaining the A $\beta$  oligomers toxicity(Hane and Leonenko, 2014), it needs further validation. We develop a fluorescence assay to interrogate if the A $\beta$  oligomers maintained by GM1 form ion channels to disrupt the plasma membrane, with the goal of uncovering the role of various membrane constituents (PC, SM, and GM1) in the disruption process. We encapsulate Ca<sup>2+</sup> inside liposomes and dialyze away the excess Ca<sup>2+</sup> from outside of the liposomes. In support of the ion channel hypothesis, we expect that the formation of A $\beta$  ion channels would lead to the efflux of Ca<sup>2+</sup>, thus resulting in an increase of Ca<sup>2+</sup> concentration outside the liposomes. We utilize a calcium sensitive dye (Fluo-4) to detect the Ca<sup>2+</sup> concentration change outside of the liposomes. To verify whether we successfully encapsulated Ca<sup>2+</sup> inside the liposomes, we add Triton X-100 to lyse the Ca<sup>2+</sup>-loaded liposomes (Supplementary Figure 1). We prepare two types of liposomes: (1) PC liposomes (L- $\alpha$ -Phosphatidylcholine+ sphingomyelin +cholesterol), and (2) GM1 liposomes (GM1+ sphingomyelin +cholesterol). We observe Ca<sup>2+</sup> efflux after adding Triton X-100 (Supplementary Figure 1), confirming that Ca<sup>2+</sup> is successfully encapsulated inside the liposomes. We incubate varying concentrations of A $\beta$  with Ca<sup>2+</sup>-encapsulated GM1 and PC liposomes. When A $\beta$  concentration is higher than 10  $\mu$ M, GM1 and PC liposomes have similar Ca<sup>2+</sup> efflux, reflecting similar disruption to liposomes, yet when A $\beta$  concentration is lower than 1  $\mu$ M, GM1 liposomes have much more Ca<sup>2+</sup> efflux than that of PC liposomes, indicating that GM1 liposomes are disrupted to a greater extent. (Figure 4A&B). Thus, at high A $\beta$  concentration (>10  $\mu$ M), A $\beta$  induces leakage of both liposome types; at low A $\beta$  concentrations, A $\beta$  induces more leakage of GM1 liposomes than that of PC liposomes, indicating that GM1 is key to the process of A $\beta$ -induced membrane disruption and may serve as a catalyst to promote disruption especially at low A $\beta$  concentrations (<1  $\mu$ M). To further demonstrate that PC and cholesterol are irrelevant to Ca<sup>2+</sup> efflux, we also test three more types of PC liposomes with different composition proportion of PC, cholesterol, and sphingomyelin (20% PC, 40% cholesterol, 40% sphingomyelin; 40% PC, 20% cholesterol, 40% sphingomyelin; 50% PC, 10% cholesterol, 40% sphingomyelin;). We encapsulate Ca<sup>2+</sup> inside these liposomes and incubate them with A $\beta$ . We find no significant Ca<sup>2+</sup>

efflux (Supplementary Figure 2), indicating no A $\beta$ -induced membrane disruption.

We observe greater Ca<sup>2+</sup> efflux in liposomes incubated with A $\beta$  as compared to liposomes incubated without A $\beta$ , suggesting that Ca<sup>2+</sup> exits liposomes through two potential mechanisms: (i) A $\beta$  forms channels on liposome membranes through which calcium can pass, or (ii) A $\beta$  disrupts the integrity of the liposome membranes. To validate the formation of A $\beta$  ion channels, we encapsulate Fluo-4 inside liposomes (Figure 4C&D) and incubate the liposomes with A $\beta$  for 3 days. Next, we add extracellular Ca<sup>2+</sup>, incubate for another 3 h, and add an excess of ethylenediaminetetraacetic acid (EDTA) to chelate the Ca<sup>2+</sup> outside the liposomes. EDTA has a higher binding affinity to Ca<sup>2+</sup> than Fluo-4 (Park and Palmer, 2015). If A $\beta$  disrupts the liposomes, the encapsulated Fluo-4 dye will diffuse to the solution outside of the liposomes, where it will be inert because all extracellular Ca<sup>2+</sup> have been chelated by EDTA. Conversely, if ion channels are formed in the liposome membranes, Ca<sup>2+</sup> will enter the liposomes through the channels to interact with Fluo-4 and emit fluorescent signals. Importantly, EDTA is too large to enter the liposomes through the ion channels. Indeed, we observe calcium influx, suggesting that A $\beta$  forms ion channels capable of passing Ca<sup>2+</sup> ions. Hence, we find that A $\beta$  may form ion channels either spontaneously at high concentrations (~10  $\mu$ M) or with GM1 as a catalyst at low concentration (~100 nM).

### **Structural characterization of A $\beta$ oligomers formed on membranes**

To determine the size of A $\beta$  oligomer species that can form channels, we utilize photo induced cross-linking of unmodified proteins (Fancy and Kodadek, 1999) (PICUP, Supplementary Figure 3) to cross-link A $\beta$  oligomers and then remove A $\beta$  oligomers from the solution using 1000 kDa MWCO centrifugation tube, so that only A $\beta$  oligomers on the membrane are retained. We determine the molecular weight of the membrane-bound oligomers by mass spectrometry (MS) (Figure 5A&B). During PICUP, the formation of a cross-linking bond reduces the molecular weight by 2.016 Da, the mass of two hydrogens. We observe four possible molecular weights 18028.4, 72196, 85711.3, and 94711.9 Da, corresponding to 4, 16, 19, and 21 A $\beta$  monomers with 14, 14, 27, and 41 cross-linkers, respectively. To determine the most probable number of monomers in A $\beta$  oligomers that can form channels, we divide the oligomer samples into 4 parts according to the molecular weight: <25 kDa, 25-45 kDa, 45-100 kDa, and >100 kDa. We then incubate these four different A $\beta$  samples with Ca<sup>2+</sup>-encapsulated liposomes and measure the fluorescence intensity, as described previously. The 45-100 kDa sample has the highest fluorescence intensity, indicating that the most likely molecular weight range of A $\beta$  oligomers that can form channels is 45-100 kDa (Figure 5C), which may consist of 16, 19, or 21 A $\beta$  monomers.

We further determine the secondary structure of A $\beta$  oligomers by circular dichroism (CD) and use BeStSel (Micsonai et al., 2018) to analyze the CD data in favor with its better estimation of  $\beta$ -sheet content. We prepare two oligomer samples, one obtained from the liposome membrane

(membrane A $\beta$  oligomers) and the other from the buffer solution (solution A $\beta$  oligomers) (Figure 5D&E). Solution A $\beta$  oligomers have 6.4% helices, 31.1% antiparallel beta-sheets, 16.4% turns, and 46.2% other structures, while membrane A $\beta$  oligomers have a significantly higher percentage (56.8%) of antiparallel beta-sheet structures. Consistent with previous reports (Devarajan and Sharmila, 2014; Matsuzaki, 2014; Okada et al., 2007), our results show that GM1 membrane can promote a conformational change of oligomeric A $\beta$  to form  $\beta$ -sheet-rich structures.

We compare the structural features of A $\beta$  oligomers and fibrils by digesting all purified A $\beta$  oligomers and fibrils with pepsin, and measuring the abundance of fragments by mass spectrometry (Proctor et al.) (Figure 5F&G). Theoretically, higher abundant peptides are likely to appear on the surface of the protein because surface residues have a higher chance to be digested, while lower abundant peptides are buried inside the structure (Proctor et al.). In both membrane A $\beta$  fibrils and solution A $\beta$  fibrils, the abundances of A $\beta_{4-19}$  peptides are high, suggesting that they are on the surface; the abundances of A $\beta_{36-42}$  peptides are low, suggesting that they are internal. Regardless of the presence or absence of GM1 liposomes, the abundances of peptides of the two fibrils are similar, indicating that although GM1 liposomes promote the formation of fibrils, they do not affect the structure of fibrils. However, the peptide abundances of the solution A $\beta$  oligomers and membrane A $\beta$  oligomers are drastically different. In membrane A $\beta$  oligomers, A $\beta_{20-34}$  peptides feature high abundances, while A $\beta_{1-17}$  peptides feature low abundances. In solution A $\beta$  oligomers, A $\beta_{4-19}$  peptides have the highest abundances, and A $\beta_{35-42}$  peptides have the lower abundances. Thus, the structures of membrane A $\beta$  oligomers, promoted by GM1 liposomes, are distinct from the structures of solution A $\beta$  oligomers. Finally, based on the abundances of peptides, the structures of A $\beta$  oligomers and fibrils are also drastically different. Overall, the presence of GM1 liposomes changes A $\beta$  oligomer structures but does not change A $\beta$  fibril structures.

### **Toxicity of A $\beta$ oligomers *in vitro***

We interrogate the toxicity of these GM1-bound A $\beta$  oligomers by cellular studies (Figure 6A). We incubate A $\beta$  with GM1 liposomes, crosslink them, and remove solution A $\beta$  oligomers. We then add the retained membrane A $\beta$  oligomers to differentiated PC12 cells. We incubate A $\beta$  with the cells for 3 days and then measure the toxicity by calcein AM and ethidium homodimer-1 live/dead viability assay. Membrane A $\beta$  oligomers at the concentration of 5  $\mu$ M exhibit toxicity (increased dead/live cells ratio) in PC12 cells (Figure 6B&C). While at the same concentration, solution A $\beta$  oligomers do not exhibit toxicity (Supplementary Figure 4). Addition of membrane A $\beta$  oligomers induces increased levels of cleaved caspase-3 compared to the live control (Supplementary Figure 5). The toxicity of membrane A $\beta$  oligomers is consistent with our fluorescence results (Figure 4): the increase of A $\beta$  oligomer concentration leads to the increase of Ca<sup>2+</sup> efflux caused by membrane disruption, suggesting that the toxicity of membrane A $\beta$  oligomers may be related



to the dysregulation of calcium homeostasis.

Numerous GM1 gangliosides are present in the membrane of the differentiated PC 12 cell line (Nishio et al., 2004). To interrogate if membrane A $\beta$  oligomers incur toxicity for cells with low GM1 content, we perform a viability assay using post-natal day 1 (P1) CD1 mouse cortical neurons, which have less GM1 since the amount of GM1 in the mouse brain has been previously reported to be minimal at birth, increasing with age (Yamamoto et al., 2008). Upon repeating the previously-described Fluo-4 assay in these primary neurons, we find that membrane A $\beta$  oligomers do not result in calcium efflux (Supplementary Figure 6). The lack of effect on primary neurons, which are notoriously less robust than cell lines, suggests that the lack of GM1 in the cell membranes of the neonate-derived primary cells protects them from being compromised by A $\beta$  oligomers, further supporting that GM1 is critically necessary for the toxicity of A $\beta$  oligomers.

## DISCUSSION

The concentration of A $\beta$  is important to the formation of oligomers (Hu et al., 2009; Thal et al., 2015). Most *in vitro* aggregation studies and A $\beta$  ion channel studies have been conducted with A $\beta$  peptide concentrations exceeding physiological concentrations by more than 1000-fold. Such a stark disparity between *in vitro* and physiological A $\beta$  concentrations required for aggregation suggests the presence of an aggregation catalyst in living cells (Luo et al., 2013; Mantyh et al., 1993). Hence, the mechanism of oligomer formation at physiological concentrations remains one of the biggest mysteries of AD. Previous studies have demonstrated the destructive effects of A $\beta$  on membranes with A $\beta$  concentrations much higher than the physiological concentration (Chi et al., 2007). Here we demonstrate that phospholipid bilayer membranes can be disrupted by A $\beta$  at nanomolar concentrations with GM1 serving as the catalyst.

GM1 is distributed as clusters on neuronal membranes in the mouse brain (Matsuzaki, 2014), and the binding of A $\beta$  to GM1 clusters may increase the local concentration of A $\beta$  and cause a conformational change that promotes aggregation (Fernández-Pérez et al., 2017; Ikeda et al., 2011; Yagi-Utsumi et al., 2010). The presence of GM1 clusters aiding the maintenance of A $\beta$  oligomers may be due to the high binding affinity between GM1 clusters and A $\beta$ . Previous reports and our results both suggest that GM1 can bind to A $\beta$  (Kakio et al., 2002) and promote the formation of A $\beta$  fibrils (Yanagisawa et al., 1995), and we further find that some A $\beta$  oligomer species are stable and not inclined to further aggregate to fibrils in the presence of GM1 (Supplementary Figure 5). Our liposome encapsulation experiments demonstrate that these stable oligomers may form channel-like structures, which provides new evidences for the hypothesis that A $\beta$  forms channel-like oligomeric structures that disrupt cellular calcium homeostasis (Jang et al., 2010). The formation of channel-like structures may be contributed by the conformational change of A $\beta$  to  $\beta$ -sheet-rich states, which has been demonstrated in both previous studies (Chen et al., 2017; Matsuzaki, 2014) and our results. Thus, the mechanism of

the disrupted calcium homeostasis may be that GM1 catalyzes the formation of A $\beta$  ion channels thereby decreasing the calcium gradient (Ledeen and Wu, 2015). Furthermore, although some studies (Arispe et al., 1993b, 1993a; Jang et al., 2010) have utilized channel conductance measurements on planar lipid bilamellar membranes to suggest that A $\beta$  forms ion channels, the size and structure information of the channel oligomers were unclear. In our work, we utilize mass spectrometry and CD to measure the possible size and secondary structure of A $\beta$  oligomers, and we also find that the binding of A $\beta$  to the GM1 membrane deforms the GM1 membrane.

Overall, we integrate computational, biochemical, and cellular studies to uncover the molecular etiology of A $\beta$  aggregation modulated by GM1 in AD pathology and identify processes responsible for neuronal toxicity. Such a comprehensive approach is necessary to decouple multiple processes accompanying AD pathophysiology.

## **METHODS**

### **Preparation of liposomes**

We dissolve GM1 (Sigma-Aldrich), L- $\alpha$ -Phosphatidylcholine (PC, Sigma-Aldrich), sphingomyelin (VWR International), and cholesterol (Fisher Scientific) in a chloroform/methanol (1:1, v/v) mixture at a total concentration of 1 mM. To mimic the GM1 cluster on the cell membrane, the molar ratio of GM1, sphingomyelin, and cholesterol is 1:2:2 for GM1 liposomes. For PC liposomes, the molar ratio of PC, sphingomyelin, and cholesterol is 1:2:2. To prepare liposomes, we first dry the organic solvents under a gentle stream of nitrogen for 2 h and then under vacuum overnight. Then, we rehydrate the resulting lipid film with HEPES buffer (10mM HEPES and 150 mM NaCl, pH 7.4), and incubate 1 h at 45 °C water bath, vortexing every 15 min. In order to prepare Ca<sup>2+</sup>-encapsulated liposomes, we replace the rehydrated lipid HEPES buffer with 10 mM CaCl<sub>2</sub> (Fisher Scientific), 10mM HEPES, and 140 mM NaCl, pH 7.4 (Colletier et al., 2002; Sanghera et al., 2011). To prepare dye-encapsulated liposomes, we replace the rehydrated lipid buffer with 0.03 mM Fluo-4 (Life Technologies), HEPES buffer. The dye-encapsulated liposomes are protected from light at all times. We sonicate the rehydrated suspension for 15 min, and then freeze-thaw for 5 cycles in the liquid nitrogen and 60°C water bath. To obtain uniform liposomes, we extrude the resulting suspension 16 times with an Avanti extruder. To encapsulate calcium and dye, we use 800 nm pore size polycarbonate filters to filter the liposomes. For the Ca<sup>2+</sup>-encapsulated and dye-encapsulated liposomes, we use 10000 Da molecular weight cut off (MWCO) dialysis cassette with HEPES buffer changed 3 times a day to remove the Ca<sup>2+</sup> and dye in the buffer outside the liposomes.

### **Fluorescence intensity determination**

We dissolve A $\beta$ 42 (Fisher Scientific) in DMSO at a concentration of 1mM and sonicate for 10 min. For the Ca<sup>2+</sup>-encapsulated liposomes, we add different concentrations (100 nM, 500 nM, 1 $\mu$ M, 10  $\mu$ M, 20  $\mu$ M, 30  $\mu$ M) of A $\beta$ 42 and incubate with liposomes for 3 days at room temperature. We add 50  $\mu$ M Fluo-4 into the incubated A $\beta$ 42 and liposomes solution, and determine the fluorescence intensity using a SpectraMax i3 plate reader. We treat control sample in the same way, except without added A $\beta$ 42. We analyze the fluorescence intensity ratio of samples incubated with different concentrations of A $\beta$ 42 and control.

We protect the dye-encapsulated liposomes from light throughout the experiment to prevent photo-bleaching. We add different concentrations of A $\beta$ 42 (500 nM, 1  $\mu$ M, 5  $\mu$ M, 10  $\mu$ M) into the liposome solutions and incubate for 3 days at room temperature. We add 14 mM CaCl<sub>2</sub> into the incubated A $\beta$ 42 and liposomes and incubate for 1 h to ensure that calcium ions have enough time to enter the liposomes through the ion channels. Then, we add 16.5 mM EDTA (excess) to bind all the Ca<sup>2+</sup> in the solution. In this way, only the Ca<sup>2+</sup> that enters the liposomes can bind with Fluo-4. Similarly, we treat control sample in the same way, except without adding A $\beta$ 42. Finally, we determine the fluorescence intensity using a SpectraMax i3 plate reader. After incubation with GM1 liposomes, A $\beta$ 42 oligomers were divided into >100, 45-100, 25-45, and <25 kDa samples according to a trident pre-stained protein ladder (GTX50875) and then the same concentration and volume resulted sample was incubated with Ca<sup>2+</sup>-encapsulated GM1 liposomes overnight. After that, the fluorescence intensity was determined, as previously mentioned.

### **Förster Resonance Energy Transfer (FRET)**

We incubate 10  $\mu$ M wild type or mutant A $\beta$ 42 with 200  $\mu$ L GM1 liposomes for 3 days. After that, we add 10  $\mu$ g/mL Alexa Fluor® 488 anti- $\beta$ -Amyloid, 1-16 Antibody (6E10, Biolegend) to the incubated liposome solution to label A $\beta$ 42 as the donor, and 10  $\mu$ g/mL Cholera Toxin Subunit B (Recombinant) Alexa Fluor™ 555 Conjugate (CTSB, Fisher Scientific) to label GM1 as the acceptor. We incubate Alexa Fluor® 488 6E10 and Alexa Fluor™ 555 CTSB with liposome solution for 1 h at room temperature. To remove the Alexa Fluor® 488 6E10 and Alexa Fluor™ 555 CTSB that did not bind to A $\beta$  and GM1 liposomes, we use 1000 kDa MWCO centrifugation tube at 1000 rpm and dilute samples 1:40 in HEPES buffer. and centrifuge to the final volume of 50  $\mu$ L and repeat this process. We use SpectraMax i3 to analyze the labeled sample. The excitation wavelength is 492 nm with 2 nm slit width. We collect the emission spectra from 518 to 750 nm. For the donor control, we treat sample in the same way except we do not add the acceptor (Alexa Fluor™ 555 CTSB) to label GM1. For the acceptor control, we treat sample in the same way except without Alexa Fluor® 488 6E10 to label A $\beta$ .

### **Fluorescence characteristics of A $\beta$ fibrils using Thioflavin T (ThT)**

We determine the effect of GM1 liposomes on A $\beta$  aggregation using ThT (VWR International). We incubate 80  $\mu$ M wild type or mutant A $\beta$  monomers in the presence or absence of GM1 liposomes containing 10  $\mu$ M ThT at 37 °C shaking in black 96-well plates with seal. We treat HEPES buffer containing 10  $\mu$ M ThT in the presence and absence of GM1 as control. We collect the fluorescence intensities of all samples every 30 seconds for 3 days using a SpectraMax i3 plate reader with excitation wavelength of 445 nm and emission wavelength of 490 nm.

### **Cross-linking**

To obtain stable A $\beta$  oligomers, particularly the A $\beta$  oligomers formed on membranes, we utilize the photo-induced cross-linking of unmodified proteins (PICUP) method (Bitan and Teplow, 2004) to cross-link. We add ammonium persulfate (APS 1 mM, 10 $\mu$ L, Dot Scientific) and Tris (2,2-bipyridyl)dichlororuthenium(II) hexahydrate (Ru(II)Bpy<sub>3</sub><sup>2+</sup> 0.05 mM, 10  $\mu$ L, Sigma-Aldrich) in 10 mM HEPES (pH 7.4) to the incubated A $\beta$  oligomer solution (180  $\mu$ L). We irradiate the resulting solution with a 500 W lamp for 5 seconds and quench the cross-linking process with 47.6 mM dithiothreitol (DTT 1M, 10  $\mu$ L, Dot Scientific).

### **Analysis of the size of A $\beta$ oligomers by SDS-PAGE and silver staining**

We incubate A $\beta$  in the presence or absence of GM1 liposomes and analyze samples at 0.5 h, 4 h, 24 h, and 72 h. We cross-link all samples using the PICUP method. For the sample in the presence of GM1 liposomes, we add 40  $\mu$ M N-octylglucoside (Dot Scientific) into the samples and then incubate at room temperature for 1 h to dissolve the lipids of the liposomes. We add leammli SDS sample buffer dye (Fisher Scientific) to the resulting solution and heat at 95°C for 10 min. We use 10% SDS-PAGE and silver staining (Fisher Scientific) to analyze the formed A $\beta$  oligomers.

### **Purification of A $\beta$ 42 oligomers on the liposomes**

We incubate A $\beta$ 42 monomers with GM1 liposomes at room temperature for 3 days and cross-link A $\beta$  before further purification. We use 1000 kDa MWCO centrifugation tubes, spun at 1300 rpm, to remove A $\beta$  oligomers that did not insert into liposomes. We treat sample with N-octylglucoside, leammli SDS sample buffer dye, heater, SDS-PAGE, and silver staining as described above. After gel electrophoresis, we cut out the gel portion according to the reference results of silver staining. We crush the cut gel portion containing the A $\beta$  oligomers of interested and dissolve them in HEPES buffer overnight in a shaker at 4°C. We centrifuge the resulting samples at 10000 g for 10 min and save the supernatants for further concentration by centrifugation. To measure the size of the A $\beta$  channels, we cut the gel according to various molecular weight ranges (>100, 45-100, 25-45, <25 kDa) and purify A $\beta$  oligomers in the gel as described above. We determine the concentration of purified A $\beta$  sample using Nanodrop and a bicinchoninic acid (BCA) protein assay kit.

## Secondary structure

We incubate A $\beta$ 42 monomers (10  $\mu$ M) for 3 days at room temperature in the presence or absence of GM1 liposomes, and then cross-link samples using PICUP. For the sample of A $\beta$ 42 incubated in the presence of GM1 liposomes, we remove A $\beta$  oligomers in the solution and add N-octylglucoside to dissolve the lipids as described previously as mentioned previously. We remove the fibrils in the resulting solution using 1000 kDa MWCO centrifugation tubes spun at 3900 rpm, and wash with HEPES buffer. We remove the monomers, dimers, and lipids using 10 kDa MWCO centrifugation tubes, spun at 3900 rpm, and wash with HEPES buffer with 40  $\mu$ M N-octylglucoside and then wash again with HEPES buffer. For the control sample of A $\beta$ 42 monomers (10  $\mu$ M) incubated in HEPES without liposomes, we remove the fibrils, monomers, and dimers in the same way except adding N-octylglucoside to dissolve the lipids and washing with 40  $\mu$ M N-octylglucoside HEPES buffer. We determine the concentration of A $\beta$  oligomers using BCA protein assay kit. We determine the secondary structure characteristics of A $\beta$ 42 channels and oligomers using a Jasco J-1500 circular dichroism spectrophotometer. We place samples in 0.1-mm path-length (200  $\mu$ L) cuvettes, and record the spectra range at 185-240 nm with 0.5 nm data pitch and scanning speed of 50 nm/min. We scan each sample three times and calculate average. We use the software BESTSEL (Micsonai et al., 2018) to analyze experimental data and get the fractional content of the helix, sheet, turn, and other structures element.

## PC-12 cell culture

We obtain PC-12 cells from the American Type Culture Collection (ATCC). For the PC-12 cells, we use DMEM (VWR International) supplemented with 5% heat inactivated horse serum (Life Technologies), 5% fetal bovine serum (Fisher Scientific), and 1% Penicillin/Streptomycin (Fisher Scientific). We culture cells at 37°C with 5% CO<sub>2</sub>. For the neuronal differentiation, we seed PC-12 cells in 96-well plates at 2000 cells/well. Prior to seeding, we treat the 96-well plate by UVO-cleaner (Jelight Company, model 18) for 30 min, coat with 10X diluted collagen and incubate at 4°C for 2 h before used. For the differentiated PC-12 cells, we use DMEM supplemented with 1% heat inactivated horse serum, 1% Penicillin/Streptomycin, and 100 ng/mL nerve growth factor (Sigma Aldrich) and culture for 1 week at 37°C with 5% CO<sub>2</sub>. Before further analysis, we confirm differentiation by visual observation using a phase contrast microscope.

## Cell viability assay

We determine cell viability using calcein AM and ethidium homodimer-1 dye. After differentiation, we add purified A $\beta$  oligomers samples to the differentiation cells and incubate for 3 days. For the dead cell controls, we add 70% methanol to cells 2 h before plate read. We remove the differentiation medium and wash the cells twice with PBS. For each well, we add 4  $\mu$ M ethidium homodimer-1 and 2  $\mu$ M calcein AM in PBS to label live and dead cells. Cells then incubate for 30

min at room temperature. We determine the fluorescence intensity by SpectraMax i3. For calcein AM, the excitation wavelength is 495 nm and the emission wavelength is 525 nm. For ethidium homodimer-1, the excitation wavelength is 495 nm and the emission wavelength is 645 nm. We take the fluorescent images on a Keyence Bz-x800 fluorescent microscope.

### **Western blot**

We incubate the differentiated PC-12 cells in the presence and absence of purified A $\beta$  oligomer samples for 3 days and then lyse with ice-cold RIPA buffer (PBS, 1% Nonidet P-40, 0.5% sodium deoxycholate, 0.1% SDS). We then collect the lysed solution for Western blot. After homogenization, we centrifuge cell samples at 12000 rpm for 20 min and collect the supernatants. We add 2X SDS sample buffer into the supernatant solutions and heat samples at 95 °C for 10 min. We separate the samples on a 12% polyacrylamide gel then transfer to a PVDF membrane with transfer buffer (25mM Tris, 192mM Glycine, 0.1% SDS, 20% Methanol, pH 8.3) at 80 V for 90 min at 4°C. We block the blots with 5% BSA in TBST (10 mM Tris-HCl, pH 7.6, 150 mM NaCl, 0.1% Tween-20) for 1 h at room temperature, then incubate with anti-Caspase 3 (Sigma AB3623) and anti-Vinculin (Sigma SAB4200729), diluted 1:100 and 1:1000, respectively, in blocking buffer (caspase-3 and vinculin) overnight at 4°C. After washing 3 times with TBST, we incubate the membrane in anti-Mouse IgG conjugated with horseradish peroxidase for 3 hr at room temperature. Before film imaging, we wash the blot 3 times with TBST and soak for 5 min in chemiluminescent substrate (Thermo Scientific catalog # 34080).

### **Mass Spectrometry (MS)**

After cross-linking and purification, we measure the molecular weight of the A $\beta$  oligomers with MS using the Sciex 5600 triple tof (AB SCIEX). Then, we digest purified A $\beta$  oligomers and fibrils with pepsin. We add 1 N HCl to the A $\beta$  samples to a final concentration of 0.04 N and suspend pepsin in 100 mM acetate buffer (pH 3.5). We add the pepsin to A $\beta$  solution as the ratio of 1:20 (enzyme:protein W:W) and incubate them for 1 h at 37°C. We add 1 M Tris buffer (pH 8) to a final concentration of 150 mM to stop the reaction. And then we determine the resulting peptides with Sciex 5600 triple tof (AB SCIEX) and analyze them using the ProteinPilot software.

### **Cryo Electron Tomography**

To increase the ratio of A $\beta$ :lipid to 1:10, we dilute GM1 liposomes 10 times and incubate the resulting GM1 liposomes with or without 10  $\mu$ M A $\beta$  for 3 days. Then, we concentrate the samples using a 100 kDa MWCO centrifuge tube, centrifuging at 1300 rpm to reduce sample volume from 1 mL to 50  $\mu$ L to increase the concentration of liposomes. We mix the samples with 10 nm gold fiducials before pipetting 4  $\mu$ L onto a freshly glow-discharged Quantifoil R2/2 holey carbon grid. We hand grids blotted from behind and plunge grids into liquid ethane using a Mark IV Vitrobot (Thermo Fisher Scientific) for vitrification. We then transfer samples under liquid nitrogen into a

Titan Krios G3i cryo TEM (Thermo Fisher Scientific) operating at 300 kV for the acquisition of tilt series. We target holes containing liposomes contained within vitreous ice data collection and collect tilt series in 2° increments from -60° to + 60° at -6.0 μm defocus. Tilt series images are acquired with a Bioquantum energy filter (Gatan) operating at the zero-loss peak using a K3 direct electron detector (Gatan) in single electron counting mode. We use a nominal magnification of ×33,000 which correspond to a pixel size of 3.3 Å/pixel. We set exposure time to achieve a total electron dose of ~120 e<sup>-</sup>/Å<sup>2</sup> for a complete tilt series. We collect six to ten tilt series from each grid. We reconstruct tomograms using the IMOD(Kremer et al., 1996) software suite.

### Computational modeling

We first model the GM1 membrane structure through CharmmGUI (Jo et al., 2008) with the ratio of SM, Cholesterol, GM1 as 4:4:2. We then model the intact structure of Aβ using SwissModel (Schwede et al., 2003) with PDB ID 1IYT as the template. The missing residues in the N-terminal region are completed by SwissModel. Next, we perform molecular dynamics simulation of the GM1 membrane-Aβ system using GROMACS (Van Der Spoel et al., 2005). The Charmm36m (Huang et al., 2017) force field for the protein and lipid parameters are used. Hydrogens for heavy atoms were added by the pdb2gmx module in the GROMACS simulation package. The system is subsequently energy-minimized for 2000 steps using the conjugate gradient algorithm, and another 2000 steps using the steepest descent algorithm. The structure is solvated using explicit water in a cubic periodic box with water molecules extending 10 Å outside the protein on all sides. Water molecules are described using a simple point charge water model. The system is solvated using TIP3 water molecules, then energy-minimized again and heated up gradually to reach a temperature of 310 K using a V-rescale thermostat with a coupling constant of 0.1 ps. The solvent density is adjusted under isobaric and isothermal conditions at 1 bar and 310 K. A Parrinello-Rahman barostat with isotropic pressure coupling and a coupling constant of 0.1 ps was used to set the pressure at 1 bar. The system is equilibrated for 10 ns in the NPT ensemble with a simulation time step of 2 fs. Finally, the production run is carried out for 100 ns for the primary system. The long-range electrostatic interactions are treated using particle-mesh Ewald sum with a cut-off of 1.0 nm. The van der Waals interactions are terminated beyond the cut-off value of 1.0 nm. The LINCS algorithm is used to constrain all bonds involving hydrogen atoms. All simulations were performed using the GROMACS simulation program. The analyses of the trajectories are performed using GROMACS and MDAnalysis (Michaud-Agrawal et al., 2011)

### REFERENCES

Alves, G.S., Oertel Knöchel, V., Knöchel, C., Carvalho, A.F., Pantel, J., Engelhardt, E., and Laks,

- J. (2015). Integrating retrogenesis theory to Alzheimer's disease pathology: insight from DTI-TBSS investigation of the white matter microstructural integrity. *Biomed Res. Int.* 2015, 291658.
- Anekonda, T.S., Quinn, J.F., Harris, C., Frahler, K., Wadsworth, T.L., and Woltjer, R.L. (2011). L-type voltage-gated calcium channel blockade with isradipine as a therapeutic strategy for Alzheimer's disease. *Neurobiol. Dis.* 41, 62–70.
- Arispe, N., Pollard, H.B., and Rojas, E. (1993a). Giant multilevel cation channels formed by Alzheimer disease amyloid beta-protein [A beta P-(1-40)] in bilayer membranes. *Proc. Natl. Acad. Sci.* 90, 10573–10577.
- Arispe, N., Rojas, E., and Pollard, H.B. (1993b). Alzheimer disease amyloid beta protein forms calcium channels in bilayer membranes: blockade by tromethamine and aluminum. *Proc. Natl. Acad. Sci. U. S. A.* 90, 567–571.
- Bartzokis, G. (2011). Alzheimer's disease as homeostatic responses to age-related myelin breakdown. *Neurobiol. Aging* 32, 1341–1371.
- Bernstein, S.L., Dupuis, N.F., Lazo, N.D., Wyttenbach, T., Condrón, M.M., Bitan, G., Teplow, D.B., Shea, J.-E., Ruotolo, B.T., Robinson, C. V., et al. (2009). Amyloid- $\beta$  protein oligomerization and the importance of tetramers and dodecamers in the aetiology of Alzheimer's disease. *Nat. Chem.* 1, 326–331.
- Bhowmik, D., Mote, K.R., MacLaughlin, C.M., Biswas, N., Chandra, B., Basu, J.K., Walker, G.C., Madhu, P.K., and Maiti, S. (2015). Cell-Membrane-Mimicking Lipid-Coated Nanoparticles Confer Raman Enhancement to Membrane Proteins and Reveal Membrane-Attached Amyloid-beta Conformation. *ACS Nano* 9, 9070–9077.
- Bieschke, J., Herbst, M., Wiglenda, T., Friedrich, R.P., Boeddrich, A., Schiele, F., Kleckers, D., Lopez del Amo, J.M., Grüning, B.A., Wang, Q., et al. (2011). Small-molecule conversion of toxic oligomers to nontoxic  $\beta$ -sheet-rich amyloid fibrils. *Nat. Chem. Biol.* 8, 93–101.
- Bitan, G., and Teplow, D.B. (2004). Rapid photochemical cross-linking--a new tool for studies of metastable, amyloidogenic protein assemblies. *Acc. Chem. Res.* 37, 357–364.
- Burns, A., and Iliffe, S. (2009). Alzheimer's disease. *BMJ* 338, b158.
- Butterfield, S.M., and Lashuel, H.A. (2010). Amyloidogenic protein-membrane interactions: mechanistic insight from model systems. *Angew. Chem. Int. Ed. Engl.* 49, 5628–5654.
- Cataldo, J.K., Prochaska, J.J., and Glantz, S.A. (2010). Cigarette smoking is a risk factor for Alzheimer's Disease: an analysis controlling for tobacco industry affiliation. *J. Alzheimer's Dis.* 19, 465–480.
- Chen, G., Xu, T., Yan, Y., Zhou, Y., Jiang, Y., Melcher, K., and Xu, H.E. (2017). Amyloid beta:



structure, biology and structure-based therapeutic development. *Acta Pharmacol. Sin.* **38**, 1205–1235.

Chi, E.Y., Frey, S.L., and Lee, K.Y.C. (2007). Ganglioside GM1-mediated amyloid-beta fibrillogenesis and membrane disruption. *Biochemistry* **46**, 1913–1924.

Choi, E.S., and Dokholyan, N. V (2021). SOD1 oligomers in amyotrophic lateral sclerosis. *Curr. Opin. Struct. Biol.* **66**, 225–230.

Colletier, J.-P., Chaize, B., Winterhalter, M., and Fournier, D. (2002). Protein encapsulation in liposomes: efficiency depends on interactions between protein and phospholipid bilayer. *BMC Biotechnol.* **2**, 1–8.

Dante, S., Hauss, T., Brandt, A., Dencher, N.A., Hauß, T., Brandt, A., and Dencher, N.A. (2008). Membrane fusogenic activity of the Alzheimer's peptide A beta(1-42) demonstrated by small-angle neutron scattering. *J. Mol. Biol.* **376**, 393–404.

Deane, R., and Zlokovic, B. V (2007). Role of the blood-brain barrier in the pathogenesis of Alzheimer's disease. *Curr. Alzheimer Res.* **4**, 191–197.

DeToma, A.S., Salamekh, S., Ramamoorthy, A., and Lim, M.H. (2012). Misfolded proteins in Alzheimer's disease and type II diabetes. *Chem. Soc. Rev.* **41**, 608–621.

Devarajan, S., and Sharmila, J.S. (2014). Molecular dynamics study of GM1 ganglioside complex with amyloid  $\beta$  peptide (A $\beta$ 42) in lipid membrane. *J. Mol. Liq.* **195**, 59–64.

Du, Y., Du, Y., Zhang, Y., Huang, Z., Fu, M., Li, J., Pang, Y., Lei, P., Wang, Y.T., and Song, W. (2019). MKP-1 reduces A $\beta$  generation and alleviates cognitive impairments in Alzheimer's disease models. *Signal Transduct. Target. Ther.* **4**, 1–12.

Fancy, D.A., and Kodadek, T. (1999). Chemistry for the analysis of protein–protein interactions: rapid and efficient cross-linking triggered by long wavelength light. *Proc. Natl. Acad. Sci.* **96**, 6020–6024.

Fernández-Pérez, E.J., Sepúlveda, F.J., Peoples, R., and Aguayo, L.G. (2017). Role of membrane GM1 on early neuronal membrane actions of A $\beta$  during onset of Alzheimer's disease. *Biochim. Biophys. Acta (BBA)-Molecular Basis Dis.* **1863**, 3105–3116.

Francis, P.T., Palmer, A.M., Snape, M., and Wilcock, G.K. (1999). The cholinergic hypothesis of Alzheimer's disease: a review of progress. *J. Neurol. Neurosurg. Psychiatry* **66**, 137–147.

Gade Malmos, K., Blancas-Mejia, L.M., Weber, B., Buchner, J., Ramirez-Alvarado, M., Naiki, H., and Otzen, D. (2017). ThT 101: a primer on the use of thioflavin T to investigate amyloid formation. *Amyloid* **24**, 1–16.

Glabe, C.G. (2008). Structural classification of toxic amyloid oligomers. *J. Biol. Chem.* **283**,

29639–29643.

Haass, C., and Selkoe, D.J. (2007). Soluble protein oligomers in neurodegeneration: lessons from the Alzheimer's amyloid beta-peptide. *Nat. Rev. Mol. Cell Biol.* *8*, 101–112.

Hane, F., and Leonenko, Z. (2014). Effect of metals on kinetic pathways of amyloid- $\beta$  aggregation. *Biomolecules* *4*, 101–116.

Hardy, J. (2006). Has the amyloid cascade hypothesis for Alzheimer's disease been proved? *Curr. Alzheimer Res.* *3*, 71–73.

Hardy, J., and Allsop, D. (1991). Amyloid deposition as the central event in the aetiology of Alzheimer's disease. *Trends Pharmacol. Sci.* *12*, 383–388.

Hardy, J.A., and Higgins, G.A. (1992). Alzheimer's disease: the amyloid cascade hypothesis. *Science* *256*, 184–185.

Hellstrand, E., Nowacka, A., Topgaard, D., Linse, S., and Sparr, E. (2013). Membrane lipid co-aggregation with  $\alpha$ -synuclein fibrils. *PLoS One* *8*, e77235.

Hu, X., Crick, S.L., Bu, G., Frieden, C., Pappu, R. V., and Lee, J.-M. (2009). Amyloid seeds formed by cellular uptake, concentration, and aggregation of the amyloid-beta peptide. *Proc. Natl. Acad. Sci.* *106*, 20324–20329.

Huang, J., Rauscher, S., Nawrocki, G., Ran, T., Feig, M., De Groot, B.L., Grubmüller, H., and MacKerell, A.D. (2017). CHARMM36m: an improved force field for folded and intrinsically disordered proteins. *Nat. Methods* *14*, 71–73.

Ikeda, K., Yamaguchi, T., Fukunaga, S., Hoshino, M., and Matsuzaki, K. (2011). Mechanism of amyloid  $\beta$ -protein aggregation mediated by GM1 ganglioside clusters. *Biochemistry* *50*, 6433–6440.

Iversen, L.L., Mortishire-Smith, R.J., Pollack, S.J., and Shearman, M.S. (1995). The toxicity in vitro of beta-amyloid protein. *Biochem. J.* *311*, 1–16.

Jakob-Roetne, R., Jacobsen, H., Jakob-Roetne, R., and Jacobsen, H. (2009). Alzheimer's disease: from pathology to therapeutic approaches. *Angew. Chemie Int. Ed.* *48*, 3030–3059.

Jang, H., Zheng, J., and Nussinov, R. (2007). Models of beta-amyloid ion channels in the membrane suggest that channel formation in the bilayer is a dynamic process. *Biophys. J.* *93*, 1938–1949.

Jang, H., Arce, F.T., Ramachandran, S., Capone, R., Azimova, R., Kagan, B.L., Nussinov, R., and Lal, R. (2010). Truncated  $\beta$ -amyloid peptide channels provide an alternative mechanism for Alzheimer's Disease and Down syndrome. *Proc. Natl. Acad. Sci.* *107*, 6538 LP – 6543.

- Jo, S., Kim, T., Iyer, V.G., and Im, W. (2008). CHARMM-GUI: a web-based graphical user interface for CHARMM. *J. Comput. Chem.* *29*, 1859–1865.
- Kagan, B.L., Hirakura, Y., Azimov, R., Azimova, R., and Lin, M.-C. (2002). The channel hypothesis of Alzheimer's disease: current status. *Peptides* *23*, 1311–1315.
- Kakio, A., Nishimoto, S., Yanagisawa, K., Kozutsumi, Y., and Matsuzaki, K. (2001). Cholesterol-dependent formation of GM1 ganglioside-bound amyloid  $\beta$ -protein, an endogenous seed for Alzheimer amyloid. *J. Biol. Chem.* *276*, 24985–24990.
- Kakio, A., Nishimoto, S., Yanagisawa, K., Kozutsumi, Y., and Matsuzaki, K. (2002). Interactions of amyloid  $\beta$ -protein with various gangliosides in raft-like membranes: importance of GM1 ganglioside-bound form as an endogenous seed for Alzheimer amyloid. *Biochemistry* *41*, 7385–7390.
- Kandimalla, R., Vallamkondu, J., Corgiat, E.B., and Gill, K.D. (2016). Understanding Aspects of Aluminum Exposure in Alzheimer's Disease Development. *Brain Pathol.* *26*, 139–154.
- Karran, E., Mercken, M., and Strooper, B. De (2011). The amyloid cascade hypothesis for Alzheimer's disease: an appraisal for the development of therapeutics. *Nat. Rev. Drug Discov.* *10*, 698.
- Klein, W.L., Krafft, G.A., and Finch, C.E. (2001). Targeting small Abeta oligomers: the solution to an Alzheimer's disease conundrum? *Trends Neurosci.* *24*, 219–224.
- Kremer, J.R., Mastrorade, D.N., and McIntosh, J.R. (1996). Computer visualization of three-dimensional image data using IMOD. *J. Struct. Biol.* *116*, 71–76.
- Lambert, M.P., Viola, K.L., Chromy, B.A., Chang, L., Morgan, T.E., Yu, J., Venton, D.L., Krafft, G.A., Finch, C.E., and Klein, W.L. (2001). Vaccination with soluble Abeta oligomers generates toxicity-neutralizing antibodies. *J. Neurochem.* *79*, 595–605.
- Ledeen, R.W., and Wu, G. (2015). The multi-tasked life of GM1 ganglioside, a true factotum of nature. *Trends Biochem. Sci.* *40*, 407–418.
- Luo, J., Yu, C.-H., Yu, H., Borstnar, R., Kamerlin, S.C.L., Grañslund, A., Abrahams, J.P., and Wañrmlañnder, S.K.T.S. (2013). Cellular polyamines promote amyloid-beta ( $A\beta$ ) peptide fibrillation and modulate the aggregation pathways. *ACS Chem. Neurosci.* *4*, 454–462.
- Mantyh, P.W., Ghilardi, J.R., Rogers, S., DeMaster, E., Allen, C.J., Stimson, E.R., and Maggio, J.E. (1993). Aluminum, iron, and zinc ions promote aggregation of physiological concentrations of  $\beta$ -amyloid peptide. *J. Neurochem.* *61*, 1171–1174.
- Martinez Hernandez, A., Urbanke, H., Gillman, A.L., Lee, J., Ryazanov, S., Agbemenyah, H.Y., Benito, E., Jain, G., Kaurani, L., Grigorian, G., et al. (2018). The diphenylpyrazole compound

anle138b blocks A $\beta$  channels and rescues disease phenotypes in a mouse model for amyloid pathology. *EMBO Mol. Med.* *10*, 32–47.

Matsumura, S., Shinoda, K., Yamada, M., Yokojima, S., Inoue, M., Ohnishi, T., Shimada, T., Kikuchi, K., Masui, D., and Hashimoto, S. (2011). Two distinct amyloid  $\beta$ -protein (A $\beta$ ) assembly pathways leading to oligomers and fibrils identified by combined fluorescence correlation spectroscopy, morphology, and toxicity analyses. *J. Biol. Chem.* *286*, 11555–11562.

Matsuzaki, K. (2014). How do membranes initiate Alzheimer's Disease? Formation of toxic amyloid fibrils by the amyloid  $\beta$ -protein on ganglioside clusters. *Acc. Chem. Res.* *47*, 2397–2404.

Michaud-Agrawal, N., Denning, E.J., Woolf, T.B., and Beckstein, O. (2011). MDAnalysis: a toolkit for the analysis of molecular dynamics simulations. *J. Comput. Chem.* *32*, 2319–2327.

Micsonai, A., Wien, F., Bulyáki, É., Kun, J., Moussong, É., Lee, Y.-H., Goto, Y., Réfrégiers, M., and Kardos, J. (2018). BeStSel: a web server for accurate protein secondary structure prediction and fold recognition from the circular dichroism spectra. *Nucleic Acids Res.* *46*, W315–W322.

Miklossy, J. (2011). Alzheimer's disease - a neurospirochetosis. Analysis of the evidence following Koch's and Hill's criteria. *J. Neuroinflammation* *8*, 90.

Mudher, A., and Lovestone, S. (2002). Alzheimer's disease—do tauists and baptists finally shake hands? *Trends Neurosci.* *25*, 22–26.

Mufamadi, M.S., Pillay, V., Choonara, Y.E., Du Toit, L.C., Modi, G., Naidoo, D., and Ndesendo, V.M.K. (2011). A review on composite liposomal technologies for specialized drug delivery. *J. Drug Deliv.* *2011*.

Nishio, M., Fukumoto, S., Furukawa, K., Ichimura, A., Miyazaki, H., Kusunoki, S., Urano, T., and Furukawa, K. (2004). Overexpressed GM1 suppresses nerve growth factor (NGF) signals by modulating the intracellular localization of NGF receptors and membrane fluidity in PC12 cells. *J. Biol. Chem.* *279*, 33368–33378.

Okada, T., Wakabayashi, M., Ikeda, K., and Matsuzaki, K. (2007). Formation of toxic fibrils of Alzheimer's amyloid  $\beta$ -protein-(1–40) by monosialoganglioside GM1, a neuronal membrane component. *J. Mol. Biol.* *371*, 481–489.

Pandey, A.P., Haque, F., Rochet, J.-C., and Hovis, J.S. (2011).  $\alpha$ -Synuclein-induced tubule formation in lipid bilayers. *J. Phys. Chem. B* *115*, 5886–5893.

Park, J.G., and Palmer, A.E. (2015). Measuring the in situ K<sub>d</sub> of a genetically encoded Ca<sup>2+</sup> sensor. *Cold Spring Harb. Protoc.* *2015*, pdb-prot076554.

Pisa, D., Alonso, R., Rábano, A., Rodal, I., and Carrasco, L. (2015). Different brain regions are infected with fungi in Alzheimer's disease. *Sci. Rep.* *5*, 15015.

Proctor, E., Fee, L., Tao, Y., Redler, R., Fay, J., Zhang, Y., Lv, Z., Mercer, I., Deshmukh, M., Lyubchenko, Y., et al. Nonnative SOD1 trimer is toxic to motor neurons in a model of amyotrophic lateral sclerosis. *113*, 614–619.

Proctor, E.A., Fee, L., Tao, Y., Redler, R.L., Fay, J.M., Zhang, Y., Lv, Z., Mercer, I.P., Deshmukh, M., Lyubchenko, Y.L., et al. (2015). Nonnative SOD1 trimer is toxic to motor neurons in a model of amyotrophic lateral sclerosis. *Proc. Natl. Acad. Sci.* *113*, 614–619.

Quist, A., Doudevski, I., Lin, H., Azimova, R., Ng, D., Frangione, B., Kagan, B., Ghiso, J., and Lal, R. (2005). Amyloid ion channels: a common structural link for protein-misfolding disease. *Proc. Natl. Acad. Sci. U. S. A.* *102*, 10427–10432.

Redler, R.L., Fee, L., Fay, J.M., Caplow, M., and Dokholyan, N. V (2014). Non-native soluble oligomers of Cu/Zn superoxide dismutase (SOD1) contain a conformational epitope linked to cytotoxicity in amyotrophic lateral sclerosis (ALS). *Biochemistry* *53*, 2423–2432.

Reynolds, N.P., Soragni, A., Rabe, M., Verdes, D., Liverani, E., Handschin, S., Riek, R., and Seeger, S. (2011). Mechanism of membrane interaction and disruption by  $\alpha$ -synuclein. *J. Am. Chem. Soc.* *133*, 19366–19375.

Sanghera, N., Correia, B.E.F.S., Correia, J.R.S., Ludwig, C., Agarwal, S., Nakamura, H.K., Kuwata, K., Samain, E., Gill, A.C., and Bonev, B.B. (2011). Deciphering the molecular details for the binding of the prion protein to main ganglioside GM1 of neuronal membranes. *Chem. Biol.* *18*, 1422–1431.

Di Scala, C., Yahi, N., Boutemour, S., Flores, A., Rodriguez, L., Chahinian, H., and Fantini, J. (2016). Common molecular mechanism of amyloid pore formation by Alzheimer's  $\beta$ -amyloid peptide and  $\alpha$ -synuclein. *Sci. Rep.* *6*, 28781.

Schwede, T., Kopp, J., Guex, N., and Peitsch, M.C. (2003). SWISS-MODEL: an automated protein homology-modeling server. *Nucleic Acids Res.* *31*, 3381–3385.

Shirwany, N.A., Payette, D., Xie, J., and Guo, Q. (2007). The amyloid beta ion channel hypothesis of Alzheimer's disease. *Neuropsychiatr. Dis. Treat.* *3*, 597.

Van Der Spoel, D., Lindahl, E., Hess, B., Groenhof, G., Mark, A.E., and Berendsen, H.J.C. (2005). GROMACS: fast, flexible, and free. *J. Comput. Chem.* *26*, 1701–1718.

Su, B., Wang, X., Nunomura, A., Moreira, P.I., Lee, H., Perry, G., Smith, M.A., and Zhu, X. (2008). Oxidative stress signaling in Alzheimer's disease. *Curr. Alzheimer Res.* *5*, 525–532.

Tachi, Y., Okamoto, Y., and Okumura, H. (2019). Conformational change of amyloid- $\beta$  40 in association with binding to GM1-glycan cluster. *Sci. Rep.* *9*, 1–11.

Tanzi, R.E., and Bertram, L. (2005). Twenty years of the Alzheimer's disease amyloid hypothesis:

a genetic perspective. *Cell* 120, 545–555.

Thal, D.R., Walter, J., Saïdo, T.C., and Fändrich, M. (2015). Neuropathology and biochemistry of A $\beta$  and its aggregates in Alzheimer's disease. *Acta Neuropathol.* 129, 167–182.

Varkey, J., Isas, J.M., Mizuno, N., Jensen, M.B., Bhatia, V.K., Jao, C.C., Petrova, J., Voss, J.C., Stamou, D.G., Steven, A.C., et al. (2010). Membrane curvature induction and tubulation are common features of synucleins and apolipoproteins. *J. Biol. Chem.* 285, 32486–32493.

Vos, T., Allen, C., Arora, M., Barber, R.M., Bhutta, Z.A., Brown, A., Carter, A., Casey, D.C., Charlson, F.J., and Chen, A.Z. (2016). Global, regional, and national incidence, prevalence, and years lived with disability for 310 diseases and injuries, 1990–2015: a systematic analysis for the Global Burden of Disease Study 2015. *Lancet* 388, 1545–1602.

Yagi-Utsumi, M., Matsuo, K., Yanagisawa, K., Gekko, K., and Kato, K. (2010). Spectroscopic Characterization of Intermolecular Interaction of Amyloid  $\beta$  Promoted on GM1 Micelles. *Int. J. Alzheimers. Dis.* 2011, 925073.

Yamamoto, N., Matsubara, T., Sato, T., and Yanagisawa, K. (2008). Age-dependent high-density clustering of GM1 ganglioside at presynaptic neuritic terminals promotes amyloid  $\beta$ -protein fibrillogenesis. *Biochim. Biophys. Acta (BBA)-Biomembranes* 1778, 2717–2726.

Yanagisawa, K. (2005). GM1 ganglioside and the seeding of amyloid in Alzheimer's disease: endogenous seed for Alzheimer amyloid. *Neurosci.* 11, 250–260.

Yanagisawa, K., Odaka, A., Suzuki, N., and Ihara, Y. (1995). GM1 ganglioside-bound amyloid  $\beta$ -protein (A $\beta$ ): A possible form of preamyloid in Alzheimer's disease. *Nat. Med.* 1, 1062.

Zhu, C., Beck, M. V., Griffith, J.D., Deshmukh, M., and Dokholyan, N. V. (2018). Large SOD1 aggregates, unlike trimeric SOD1, do not impact cell viability in a model of amyotrophic lateral sclerosis. *Proc. Natl. Acad. Sci.* 115, 201800187.

## ACKNOWLEDGEMENTS

We acknowledge support from the National Institutes for Health 1R35 GM134864, the Huck Institutes of the Life Sciences, and the Passan Foundation. The project described was also supported by the National Center for Advancing Translational Sciences, National Institutes of Health, through Grant UL1 TR002014. The content is solely the responsibility of the authors and does not necessarily represent the official views of the

NIH. We also acknowledge the help from Brianna L. Hnath, Martin Dokholyan and Sophia Dokholyan with the purification of membrane A $\beta$  oligomers.

## FIGURES

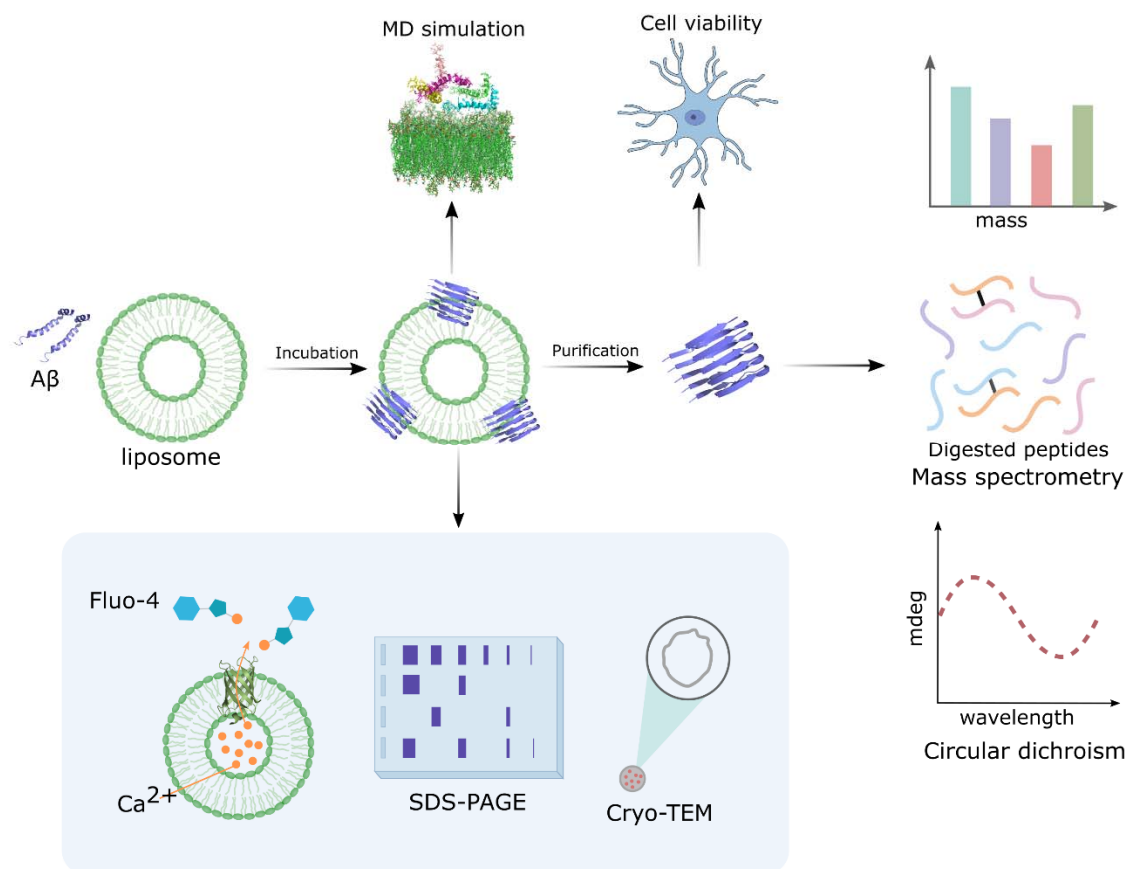

**Figure 1. Schematic of the hypothesis and the design.** We incubate A $\beta$  with GM1 liposomes to determine the effect of GM1 membrane on the formation of A $\beta$  fibrils and oligomers. We perform MD simulation to explore the interaction between A $\beta$  and GM1 membrane. We purify the A $\beta$  oligomers formed on liposomes membrane, determine the toxicity, and characterize the structure with CD and mass spectrometry. We design a calcium-encapsulation assay to provide new evidences for the A $\beta$  ion channel hypothesis. We also determine the effect of A $\beta$  on the morphology of liposomes membrane using Cryo-TEM.



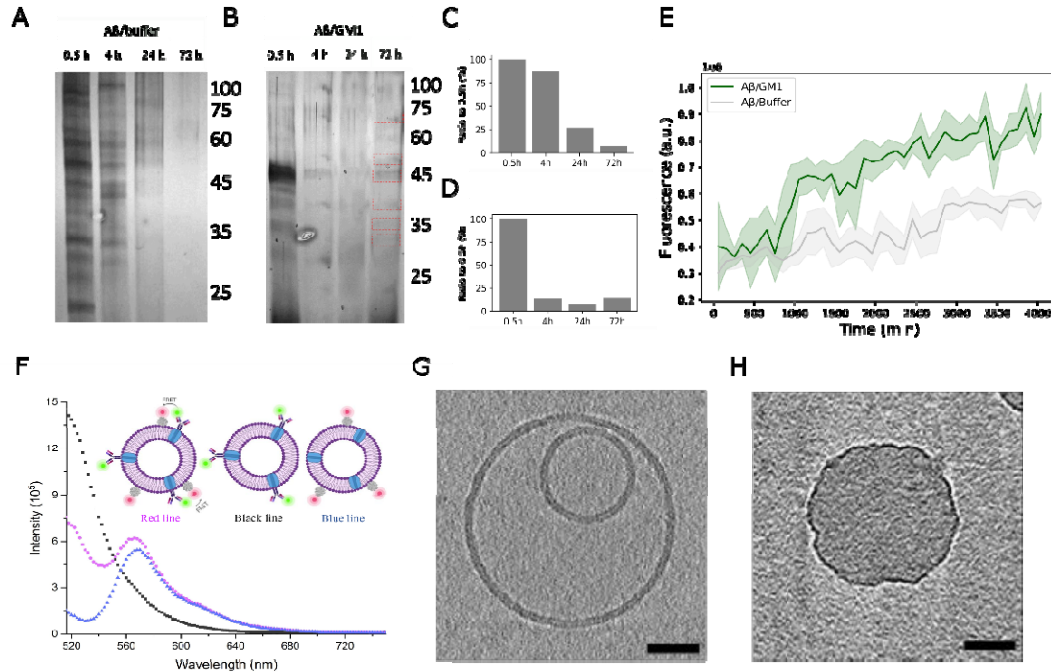

**Figure 2. Interaction between A $\beta$  and GM1 liposome.** (A), (B) SDS-PAGE and silver staining results of A $\beta$  oligomers formed in the presence and absence of GM1 liposomes at different time points. (C), (D) Quantitative analysis of A $\beta$  oligomers formed in the presence and absence of GM1 liposomes at different time points. (E) The formation of A $\beta$  fibrils is identified by ThT. (F) FRET results of GM1 and A $\beta$ . The donor is Alexa Fluor® 488 6E10, the antibody of A $\beta$ . The acceptor is Alexa Fluor™ 555 CTSB, a molecule that specifically binds to GM1. Red curve: A $\beta$ , GM1 liposomes, donor and acceptor. Black curve: A $\beta$ , GM1 liposomes and donor. Blue curve: A $\beta$ , GM1 liposomes and acceptor. (G&H) An approximately 10-nm thick digital slices through tomograms of liposomes incubated with (G) or without A $\beta$  (H). The lipid bilayer is visible in the untreated sample and only a monolayer is visible after treatment. Scale bars represent 50 microns.

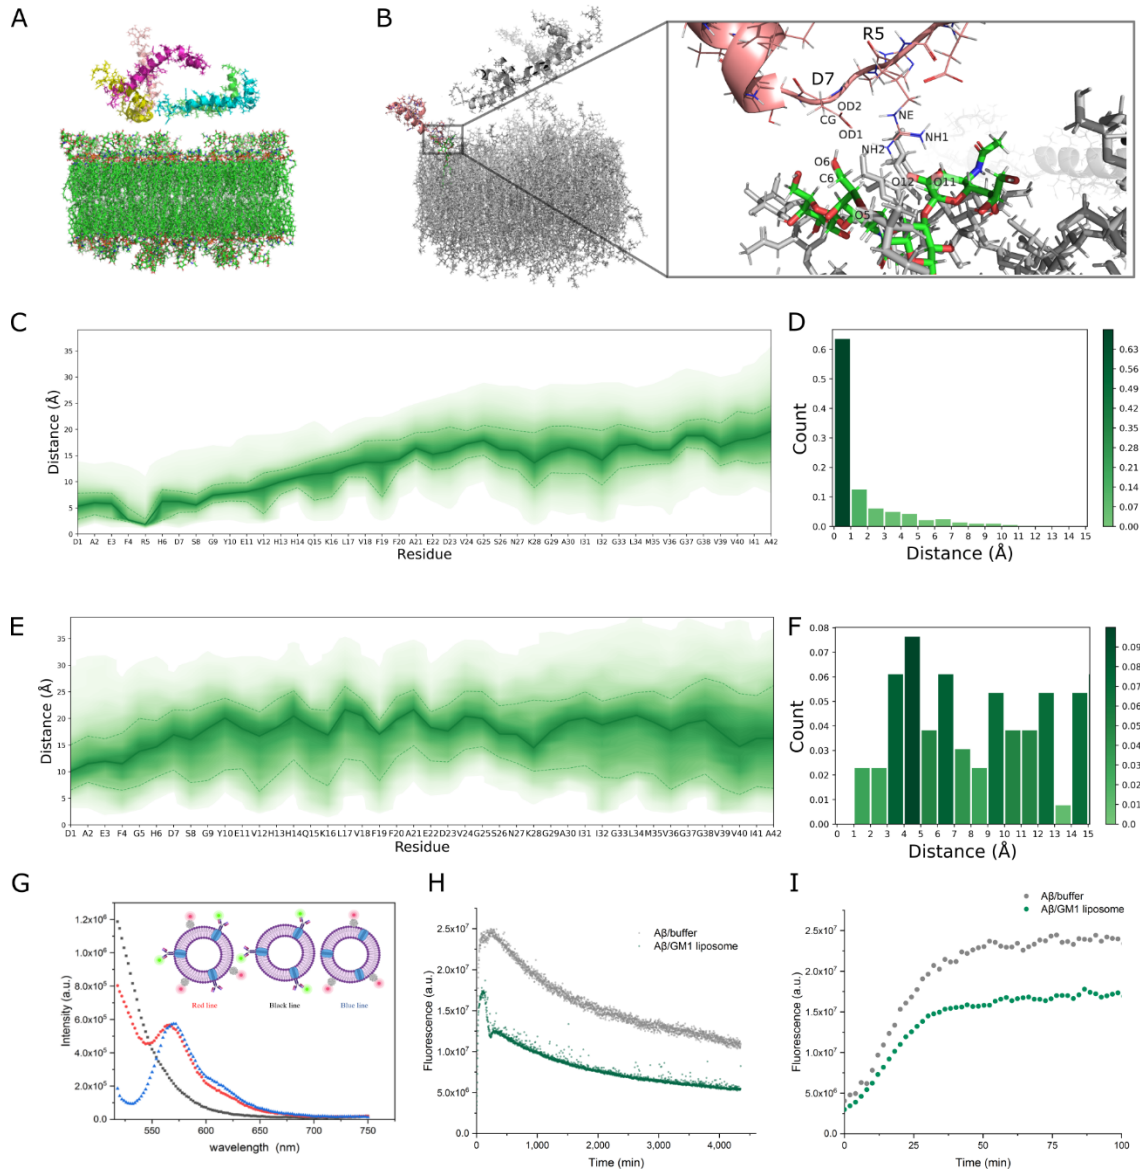

**Figure 3. Interaction between wild type, mutant A $\beta$ , and GM1 liposome.** (A) The initial structure for the molecular dynamics simulation of GM1 membrane and 5 A $\beta$  monomers. (B) The 3D view of the atoms in the interacting interface between R5 and GM1. (C) The distances between atoms of each residue in wild type A $\beta$  and atoms of all GM1 in the membrane. (D) The histogram of the minimum distances between R5 in A $\beta$  and GM1 in the membrane of all steps in the MD simulation. (E) The distances between the A $\beta$  mutant R5G and GM1. (F) The histogram of the minimum distances between G5 and GM1. G5 is the fifth residue in the A $\beta$  mutant R5G. (G) FRET between R5G and GM1. The donor is Alexa Fluor® 488 6E10, the antibody of A $\beta$ . The acceptor is Alexa Fluor™ 555 CTSB, a molecule that specifically binds to GM1. Red curve: mutant A $\beta$ , GM1 liposomes, donor and acceptor. Black curve: mutant A $\beta$ , GM1 liposomes and

donor. Blue curve: mutant A $\beta$ , GM1 liposomes and acceptor. (H) The formation of mutant A $\beta$  (R5G) fibrils are identified by ThT. (I) The formation of mutant A $\beta$  (R5G) fibrils in the first 100 min.

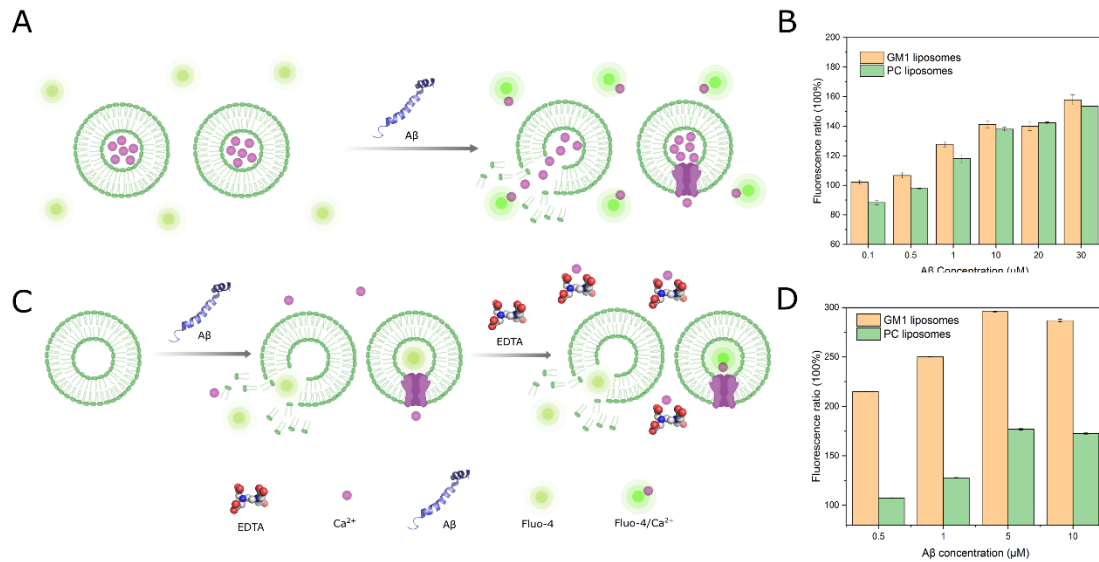

**Figure 4.** (A) Schematic of the experimental design to prove the formation of A $\beta$  ion channels with Ca<sup>2+</sup>-encapsulated GM1 liposomes. (B) The ratio of the fluorescence intensity of Ca<sup>2+</sup>-encapsulated liposomes incubated with A $\beta$  to that without A $\beta$ . (C) Schematic of the experimental design to prove the formation of A $\beta$  ion channels with dye-encapsulated GM1 liposomes. (D) The ratio of the fluorescence intensity of dye-encapsulated liposomes incubated with A $\beta$  to that without A $\beta$ .

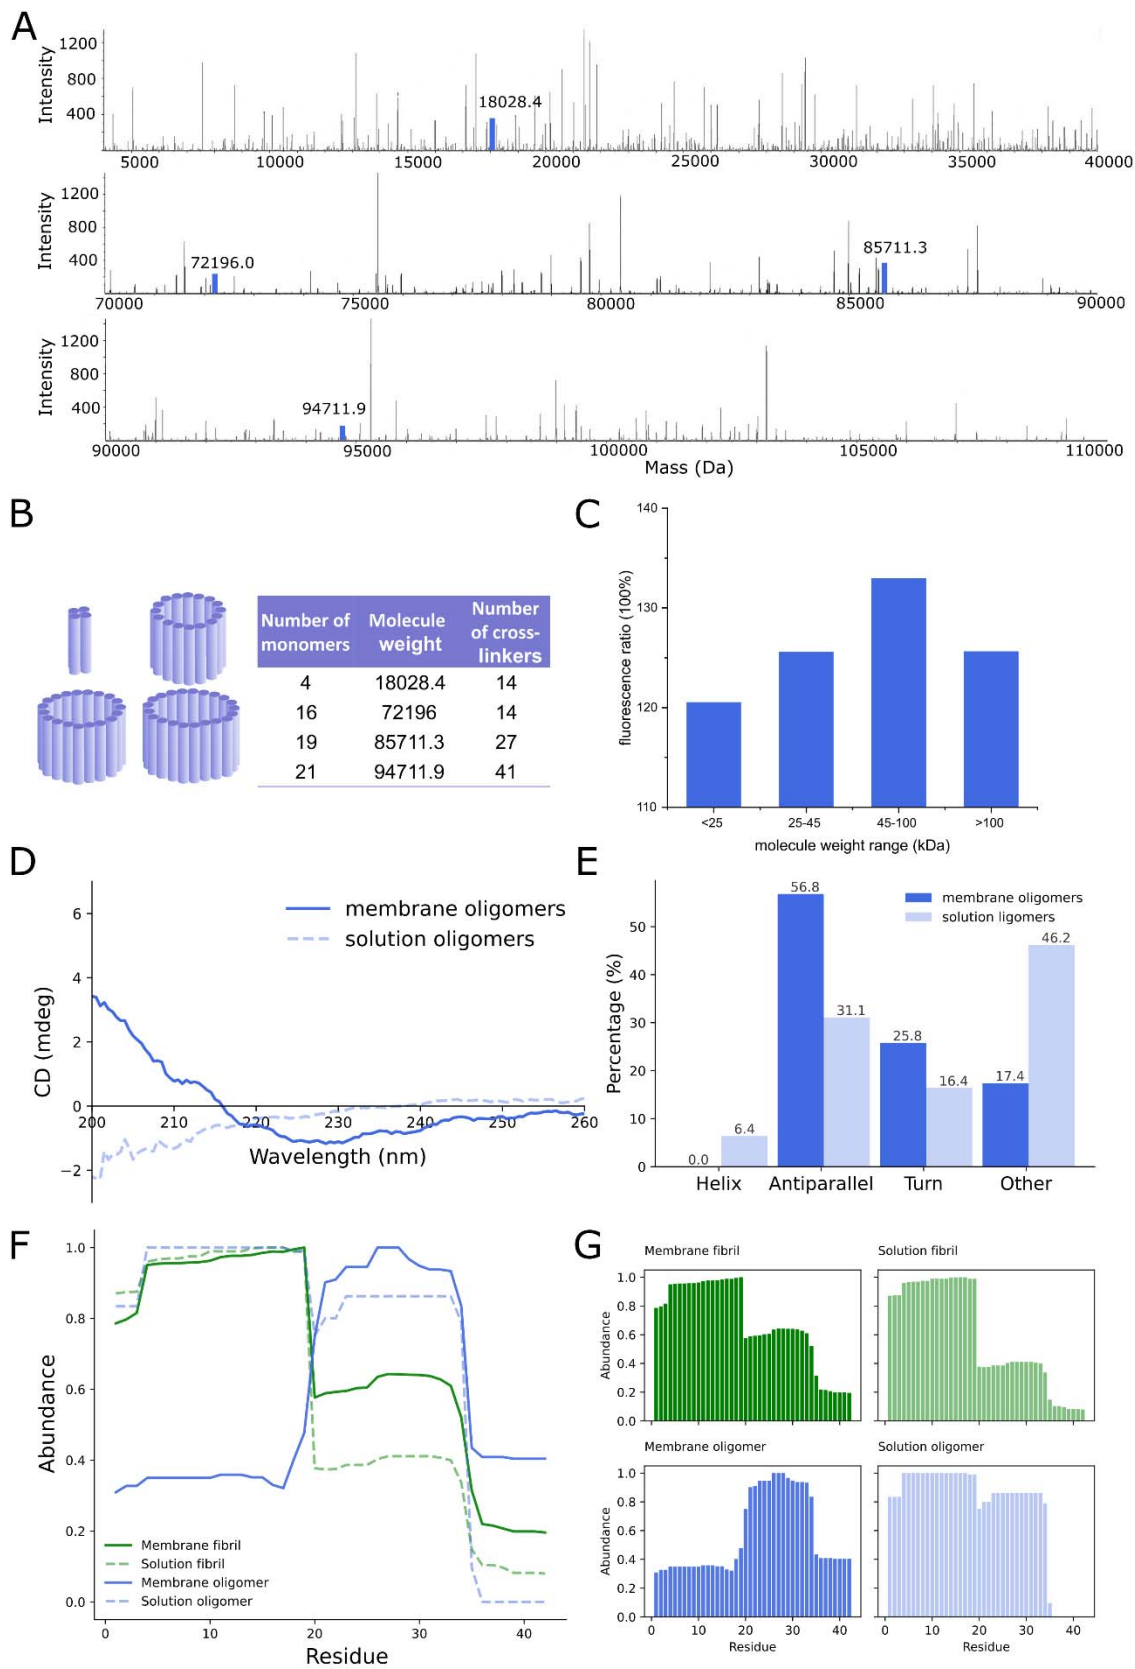

**Figure 5. Structure characterization of membrane A $\beta$  oligomers.** (A) After purification, the molecule weights of A $\beta$  oligomers are analyzed by mass spectrometer. (B) Based on the results of mass spectrometry, there are four possible cross-linked A $\beta$  oligomer species that may form ion channels. (C) We divide the membrane A $\beta$  oligomers into four samples according to the molecular weights. Then, we incubate the four samples with the Ca<sup>2+</sup>-encapsulated liposome and determine the fluorescence intensity. (D), (E) The secondary structure of the A $\beta$  oligomers formed in the presence and absence of GM1 liposomes. (F), (G) The residue abundance of A $\beta$  oligomers and fibrils formed in the presence and absence of GM1 liposomes.

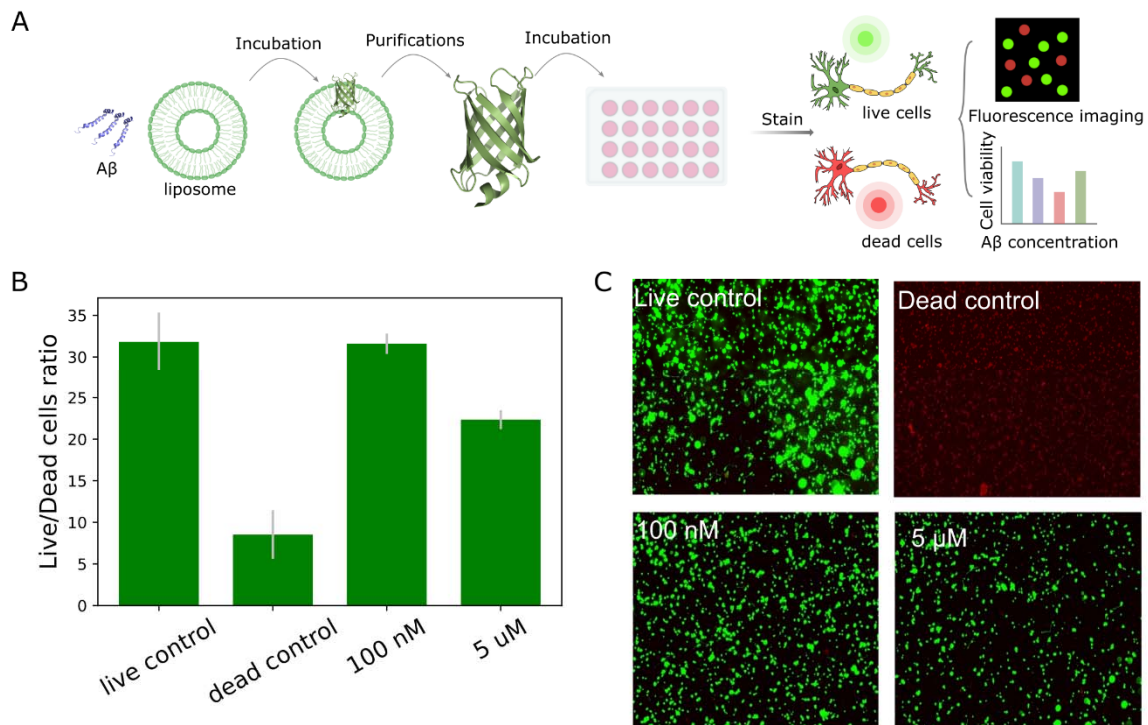

**Figure 6. A $\beta$  oligomers formed on liposome membranes are cytotoxic.** (A) Schematic of cell viability experiment. (B) PC-12 cells incubated with and without A $\beta$  oligomers. Cell viability is assessed by Calcein AM/ethidium homodimer-1 and calculated by the ratio of dead cells to live cells. (C) PC-12 cells incubated with A $\beta$  oligomers of different concentration. Live cells are stained by Calcein AM in green and dead cells are stained by ethidium homodimer-1 in red.
